# Supplementary material for: Epidemiology and SARS-CoV-2 Infection Patterns among Youth Followed at a Large Los Angeles Health Network during 2020–2022: Clinical Presentation, Prevalent Strains, and Correlates of Disease Severity
Source: MDPI journal article supplement (doi:10.3390/vaccines11061024), 2023-05-25
Supplement: s1 [file s1]

Table S1. Demographic characteristics and outcomes of MISC in Los Angeles County youth.

|                               | March 13, 2020-March 31, 2021<br>(N=11) |     | April 1, 2021-March 31, 2022<br>(N=14) |     |
|-------------------------------|-----------------------------------------|-----|----------------------------------------|-----|
| Sex                           | N                                       | %   | N                                      | %   |
| Female (N, %)                 | 4                                       | 36% | 7                                      | 50% |
| Male (N, %)                   | 7                                       | 54% | 7                                      | 50% |
| Age group at testing          | N                                       | %   | N                                      | %   |
| < 1 year (N, %)               | 0                                       | 0%  | 1                                      | 7%  |
| 1 - 5 years (N, %)            | 1                                       | 9%  | 5                                      | 36% |
| 6 -11 years (N, %)            | 6                                       | 55% | 4                                      | 29% |
| 12 – 18 years (N, %)          | 4                                       | 36% | 4                                      | 29% |
| 19 – 24 years (N, %)          | 0                                       | 0 % | 0                                      | 0%  |
| Mean Age (years)              | 12.5                                    |     | 6.4                                    |     |
| <b>Race/ethnicity</b>         | N                                       | %   | N                                      | %   |
| Asian (N, %)                  | 0                                       | 0%  | 1                                      | 7%  |
| Black/African American (N, %) | 1                                       | 9%  | 3                                      | 21% |
| White (N, %)                  | 3                                       | 27% | 7                                      | 50% |
| Hispanic (N, %)               | 6                                       | 55% | 3                                      | 21% |
| Comorbidities                 | 3                                       | 27% | 1                                      | 7%  |
| <b>Outcomes</b>               | N                                       | %   | N                                      | %   |
| Death (N, %)                  | 1                                       | 9%  | 1                                      | 7%  |
| Survival (N, %)               | 10                                      | 91% | 13                                     | 93% |

Table S2. SARS-COV-2 reinfection by subgroup in year 2 (N=109).

|                             | N (%)      |
|-----------------------------|------------|
| <b>Sex</b>                  |            |
| Female                      | 50 (45.9%) |
| Male                        | 59 (54.1%) |
| <b>Age group at testing</b> |            |
| < 1 year                    | 4 (3.7%)   |
| 1 - 5 years                 | 20 (18.3%) |
| 6 -11 years                 | 26 (23.9%) |
| 12 – 18 years               | 26 (23.9%) |
| 19 – 24 years               | 33 (30.3%) |
| Mean Age (SD)               | 13.2 (7.5) |
| <b>Race/ethnicity*</b>      |            |
| Asian                       | 10 (9.2%)  |
| Black/African American      | 11 (10.1%) |
| Hispanic/Latino             | 47 (43.1%) |
| White                       | 48 (44%)   |
| Other                       | 0 (0%)     |
| Missing                     | 0 (0%)     |
| <b>Type of Insurance</b>    |            |
| Uninsured                   | 2 (1.8%)   |
| Medical/Safety Net          | 27 (24.8%) |
| HMO/Private                 | 80 (73.4%) |
| <b>Comorbidities</b>        |            |
| Obesity                     | 18 (16.5%) |
| Pulmonary                   | 25 (22.9%) |
| Cardiac                     | 5 (4.6%)   |
| Other                       | 0 (0%)     |
| None                        | 66 (60.6%) |
| <b>Occupation (Patient)</b> |            |
| Working                     | 9 (8.3%)   |
| Student                     | 95 (87.2%) |
| Disabled                    | 2 (1.8%)   |
| Other                       | 3 (2.8%)   |
| <b>Disease Severity</b>     |            |
| Asymptomatic                | 30 (27.5%) |
| Mild                        | 74 (67.9%) |
| Moderate                    | 4 (3.7%)   |
| Severe or Critical          | 1 (0.9%)   |

Data are shown for Year 2 because almost all reinfections occurred during this period.

\*Individuals could self-identify as ≥ 1 race/ethnicity
